# Supplementary material for: A paper-embedded thermoplastic microdevice integrating additive-enhanced allele-specific amplification and silver nanoparticle-based colorimetric detection for point-of-care testing
Source: Royal Society of Chemistry journal article supplement (doi:10.1039/d3lc00739a), 2023-01-01
Supplement: d3lc00739a1.pdf [file d3lc00739a1.pdf]

Electronic Supplementary Information

Paper-embedded thermoplastic microdevice integrating additive-  
enhanced allele-specific amplification and silver nanoparticle-  
based colorimetric detection for point-of-care testing

Duc Anh Thai, Seung Kyun Park and Nae Yoon Lee\*

*Department of BioNano Technology, Gachon University, 1342 Seongnam-daero,  
Sujeong-gu, Seongnam-si, Gyeonggi-do, 13120, Korea.*

\*Corresponding author. Tel: +82 31 750 8556, Fax: +82 31 750 8774, Email:  
nylee@gachon.ac.kr (N.Y. Lee).

**Table S1** The primer sequences used for loop-mediated isothermal amplification of *Hbb*, *AR*, and *esp* genes. The SNP position in primers is highlighted in bold. The mismatch nucleotide is underlined.

| Target gene        | Primer name | Primer sequence (5'-3')                                 |
|--------------------|-------------|---------------------------------------------------------|
| <i>Hbb</i>         | F3          | GCAGCCTAAGGGTGGGAA                                      |
|                    | B3          | GACACCATGGTGCATCTGA                                     |
|                    | FIP         | ACTGGGCATGTGGAGACAGAGA-TAGGCAGAGAGAGTCAGTGC             |
|                    | BIP (HbS)   | AGGGCCTCACCACCAACTTCT <u>A</u> GAGAAGTCTGCCGTTACTG      |
|                    | BIP (HbA)   | AGGGCCTCACCACCAACTTCA <u>A</u> GAGAAGTCTGCCGTTACTG      |
|                    | LB          | TCACCTTGCCCCACAGG                                       |
| <i>AR (rs6152)</i> | F3          | ACATCCTGAGCGAGGCC                                       |
|                    | B3          | GCCCATGGACACCGACA                                       |
|                    | FIP AA      | <b>T</b> <u>G</u> CCCTCGCTCTCCCGCTGATGCAACTCCTTCAGCAACA |
|                    | FIP GG      | <b>C</b> <u>G</u> CCCTCGCTCTCCCGCTGATGCAACTCCTTCAGCAACA |
|                    | BIP         | GGCTCCCACTTCCTCCAAGGGGCGTTGTCAGAAATGGTCG                |
| <i>esp</i>         | F3          | CCAGAACACTTATGGAACAG                                    |
|                    | B3          | GTTGGGCTTTGTGACCTG                                      |
|                    | FIP         | CGTGTCTCCGCTCTCTTCTTT-TTATTTGCAAGATATTGATGGTG           |
|                    | BIP         | ATCGGGAAACCTGAATTAGAAGAAG-AACTCGTGGATGAATACTTTC         |
|                    | LB          | TGATGTTGACACAACAGTTAAGGG                                |

**A** Without DNA target

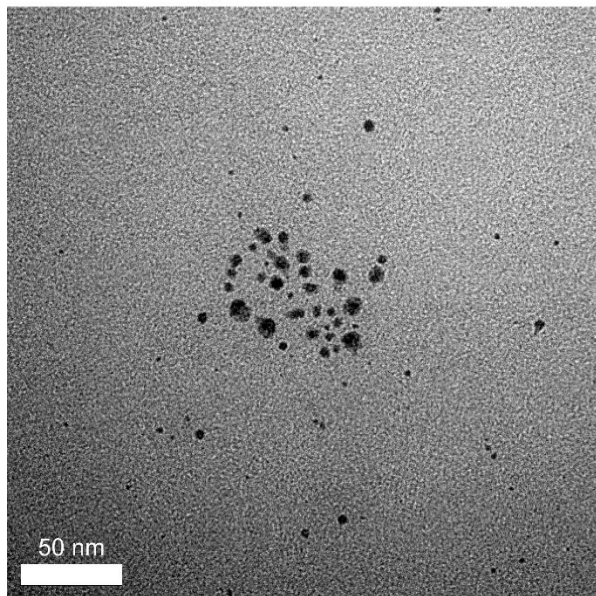

**B** With DNA target

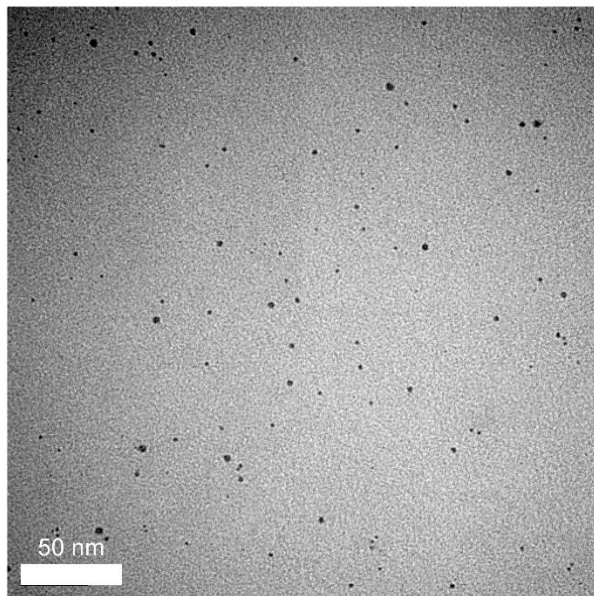

**Fig. S1** TEM images of the hydrazine-induced silver nanoparticles (A) in the absence of the target DNA and (B) in the presence of the target DNA.

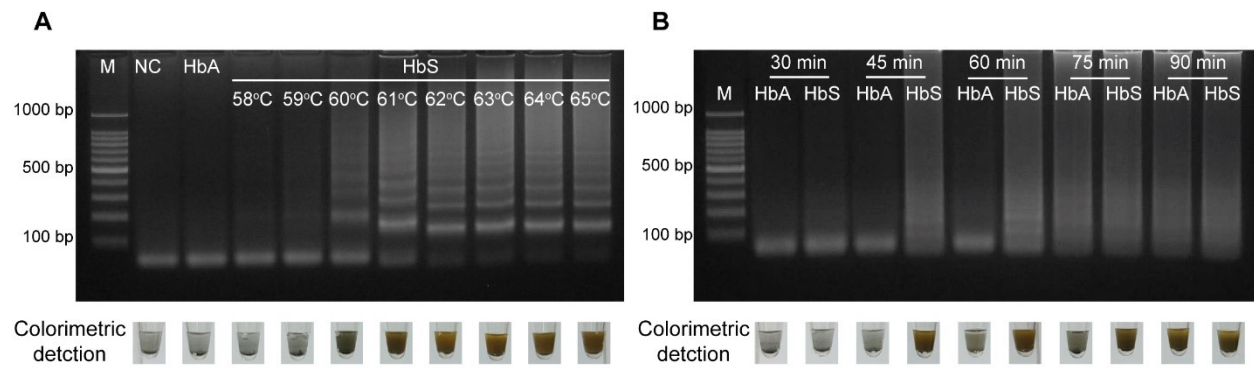

**Fig. S2** Effect of different (A) reaction temperatures and (B) reaction times on AS-LAMP reaction for SNP detection. Experiments performed using a HbS primer set and  $10^4$  copies/ $\mu$ L of DNA template.

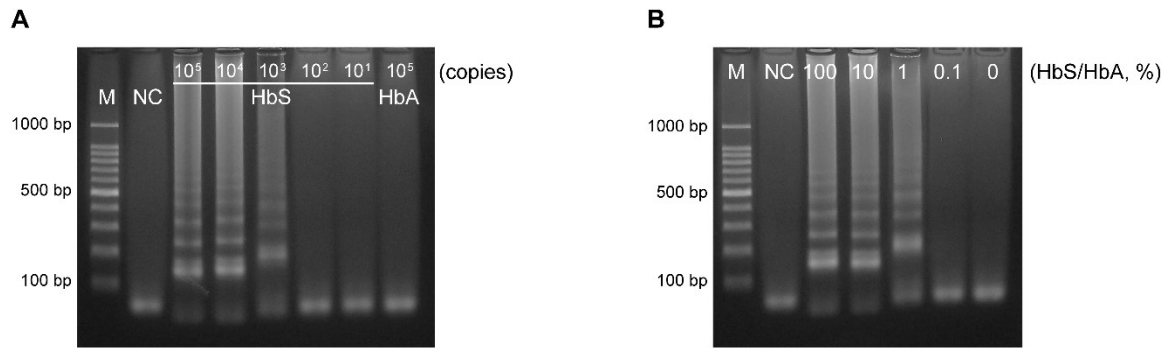

**Fig. S3** Agarose gel electrophoresis result showing (A) the sensitivity of the LAMP assay for HbS detection and (B) detection of the HbS target in samples at varying concentrations. M: ladder. NC: negative control.

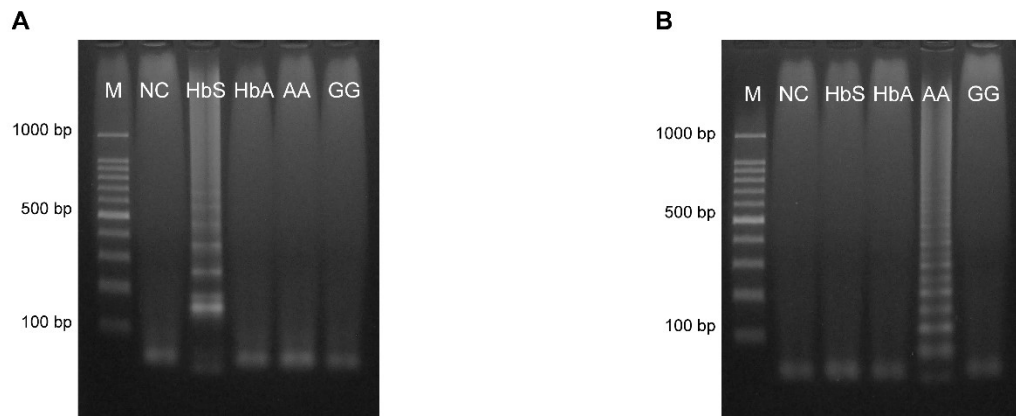

**Fig. S4** (A) Agarose gel electrophoresis result showing the selectivity test for HbS detection. Experiments were performed using a HbS primer set and  $10^4$  copies/ $\mu\text{L}$  of DNA template. (B) Agarose gel electrophoresis result showing the selectivity test for rs6152AA detection. Experiments were performed using a rs6152AA primer set and  $10^4$  copies/ $\mu\text{L}$  of DNA template. M: ladder. NC: negative control.

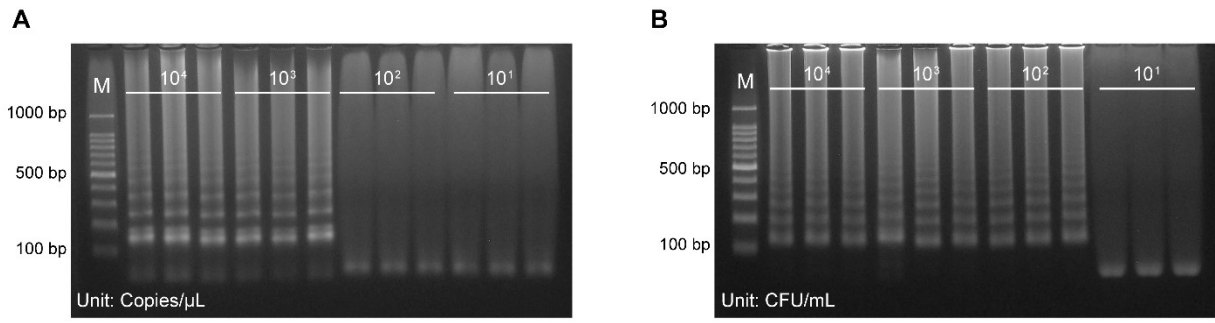

**Fig. S5** Agarose gel electrophoresis result showing the sensitivity test of the microdevices for (A) human serum spiked with different concentrations of HbS template performed using a HbS primer set and (B) tap water spiked with different concentrations of *E. faecium* performed using a *esp* primer set. M: ladder. NC: negative control.

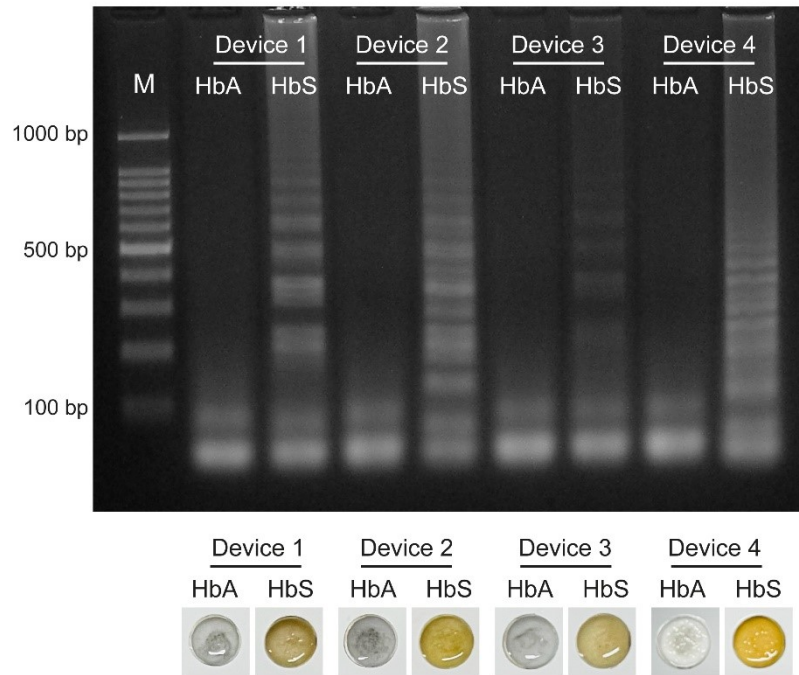

**Fig. S6** Results of the reproducibility tests performed using the microdevice for HbS detection in spiked serum. Experiments were performed using a HbS primer set and  $10^4$  copies/ $\mu\text{L}$  of DNA template. The reproducibility was demonstrated by repeating the experiments four times.



**A**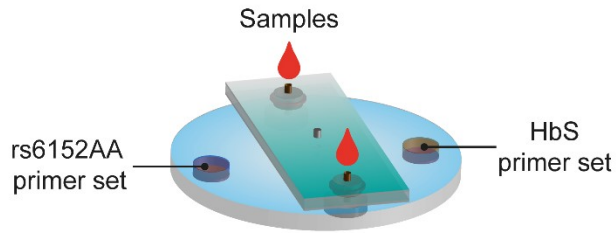**B**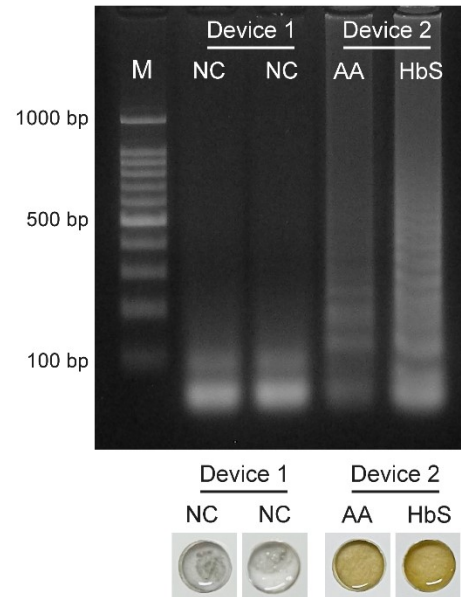

**Fig. S7** (A) Experimental design and (B) results of the multiplexing tests performed using the microdevice for rs6152 and HbS detection in spiked serum. Experiments were performed using rs6152AA and HbS primer set and  $10^4$  copies/ $\mu$ L of DNA template. M: ladder. NC: negative control.

**Table S2.** Comparison showing several microdevices for point-of-care testing.

| Device                                   | Integration                                                                                                                                               | Time    | Target                                                                                  | Limit of detection                                  | Sample test                                     | Ref.      |
|------------------------------------------|-----------------------------------------------------------------------------------------------------------------------------------------------------------|---------|-----------------------------------------------------------------------------------------|-----------------------------------------------------|-------------------------------------------------|-----------|
| Integrated paper-based biosensor         | <ul style="list-style-type: none"> <li>• FTA card-based extraction</li> <li>• LAMP reactions</li> <li>• AuNPs-based detection</li> </ul>                  | 80 min  | <i>Escherichia coli</i><br><i>Streptococcus pneumoniae</i>                              | 10 <sup>1</sup> -10 <sup>3</sup> CFU/mL             | Spiked drinking water, milk, blood, and spinach | [1]       |
| Paper-origami device                     | <ul style="list-style-type: none"> <li>• Lysis buffer (95°C)</li> <li>• LAMP reactions</li> <li>• Calcein-based fluorescence</li> </ul>                   | 60 min  | Bovine herpes virus-1 (BoHV-1)<br><i>Brucella</i><br><i>Leptospira</i>                  | <1 pg/μL of DNA                                     | Spiked semen                                    | [2]       |
| Origami paper microdevice                | <ul style="list-style-type: none"> <li>• PMA treatment and DNA purification</li> <li>• LAMP reaction</li> <li>• Methylene blue-based detection</li> </ul> | 120 min | <i>Escherichia coli</i><br><i>Salmonella</i> spp.                                       | 10 <sup>3</sup> CFU/mL                              | Not reported                                    | [3]       |
| Pop-up paper-based microdevice           | <ul style="list-style-type: none"> <li>• FTA card-based extraction</li> <li>• LAMP reactions</li> <li>• Colorimetric chemosensor</li> </ul>               | 110 min | <i>Enterococcus faecium</i>                                                             | 10 <sup>2</sup> CFU/mL<br>10 <sup>3</sup> CFU/g     | Milk and sausage                                | [4]       |
| Smartphone-assisted genotyping           | <ul style="list-style-type: none"> <li>• On-tube LAMP reaction</li> <li>• 3D-printed cassette-based detection (Cresol red)</li> </ul>                     | 90 min  | <i>Salmonella</i> Pullorum rfbS gene                                                    | 1500 copies/μL and 3.98 pg/μL                       | Poultry samples                                 | [5]       |
| Hybridisation chip                       | <ul style="list-style-type: none"> <li>• On-tube LAMP reaction</li> <li>• Polycarbonate chips detection (HNB)</li> </ul>                                  | 70 min  | <i>GRIK4</i> gene (rs1954787)                                                           | 10 <sup>2</sup> gDNA copies                         | Buccal swabs                                    | [6]       |
| CD-like microfluidic chip                | <ul style="list-style-type: none"> <li>• LAMP reaction</li> <li>• Colorimetric and fluorescent detection (SYBR Green I and Neutral red)</li> </ul>        | 60 min  | CALR mutations                                                                          | 10 <sup>1</sup> copies/μL                           | Parasite lysate                                 | [7]       |
| Lateral flow dipstick                    | <ul style="list-style-type: none"> <li>• On-tube LAMP reaction</li> <li>• Lateral flow dipstick</li> </ul>                                                | 70 min  | N51I mutation ( <i>Plasmodium falciparum</i> )                                          | 0.02 ng/reaction                                    | Blood                                           | [8]       |
| Paper-embedded thermoplastic microdevice | <ul style="list-style-type: none"> <li>• Silica-based preparation</li> <li>• LAMP reaction</li> <li>• AgNPs-based colorimetric detection</li> </ul>       | 70 min  | Sickle cell anemia<br>Hair loss- associated SNP (rs6152)<br><i>Enterococcus faecium</i> | 10 <sup>3</sup> copies/μL<br>10 <sup>2</sup> CFU/mL | Spiked serum and water                          | This work |

**References:**

1. J. R. Choi, J. Hu, R. Tang, Y. Gong, S. Feng, H. Ren and F. Xu, An integrated paper-based sample-to-answer biosensor for nucleic acid testing at the point of care, Lab Chip 16 (3) (2016) 611-621.
2. Z. Yang, G. Xu, J. Reboud, S. A. Ali, G. Kaur, J. McGiven, J. M. Cooper, Rapid veterinary diagnosis of bovine reproductive infectious diseases from semen using paper-origami DNA microfluidics, ACS Sens. 3 (2) (2018) 403-409.
3. P. T. Trieu, N. Y. Lee, Based all-in-one origami microdevice for nucleic acid amplification

- testing for rapid colorimetric identification of live cells for point-of-care testing. *Anal. Chem.* 91 (17) (2019) 11013-11022.
4. T. N. D. Trinh, D. A. Thai, and N. Y. Lee. Pop-up paper-based and fully integrated microdevice for point-of-care testing of vancomycin-resistant *Enterococcus*, *Sens Actuators B Chem.*, 345 (2021) 130362.
  5. J. Wen, H. Gou, S. Wang, Q. Lin, K. Chen, Y. Wu, X. Huang, H. Shen, X. Qu, J. Lin, and M. Liao, Competitive activation cross amplification combined with smartphone-based quantification for point-of-care detection of single nucleotide polymorphism, *Biosens. Bioelectron.* 183 (2021) 113200.
  6. E. S. Yamanaka, L. A. Tortajada-Genaro, N. Pastor, and Á. Maquieira, Polymorphism genotyping based on loop-mediated isothermal amplification and smartphone detection, *Biosens. Bioelectron.* 109 (2018) 177–183.
  7. S. Yongkiettrakul, J. Kampeera, W. Chareanchim, R. Rattanajak, W. Pornthanakasem, W. Kiatpathomchai, and D. Kongkasuriyachai, Simple detection of single nucleotide polymorphism in *Plasmodium falciparum* by SNP-LAMP assay combined with lateral flow dipstick, *Parasitol. Int.* 66 (2017) 964–971.
  8. G. Cao, J. Kong, Z. Xing, Y. Tang, X. Zhang, X. Xu, Z. Kang, X. Fang, and M. Guan, Rapid detection of CALR type 1 and type 2 mutations using PNA-LNA clamping loop-mediated isothermal amplification on a CD-like microfluidic chip, *Anal. Chim. Acta* 1024 (2018) 123–135.

**Video S1** The operation process of the paper-embedded thermoplastic microdevice.

**Video S2** The time-lapse recording video of time-dependent colorimetric reaction for 15 min.
